# Supplementary material for: Tidal influence on carbon dioxide and methane fluxes from tree stems and soils in mangrove forests
Source: Copernicus journal article supplement (doi:10.5194/egusphere-2024-533), 2024-02-26
Supplement: Supplementary file 1 [file egusphere-2024-533-supplement.pdf]

*Supplement of*  
**Tidal influence on carbon dioxide and methane fluxes from tree stems and soils in mangrove forests**

Zhao-Jun Yong<sup>1</sup>, Wei-Jen Lin<sup>1</sup>, Chiao-Wen Lin<sup>2</sup>, Hsing-Juh Lin<sup>1\*</sup>

5 <sup>1</sup>Department of Life Sciences and Innovation and Development Center of Sustainable Agriculture, National Chung Hsing University, Taichung 40227, Taiwan

<sup>2</sup>Department of Marine Environment and Engineering and The Center for Water Resources Studies, National Sun Yat-sen University, Kaohsiung 80424, Taiwan

Correspondence to: Hsing-Juh Lin (hjlin@dragon.nchu.edu.tw)

10

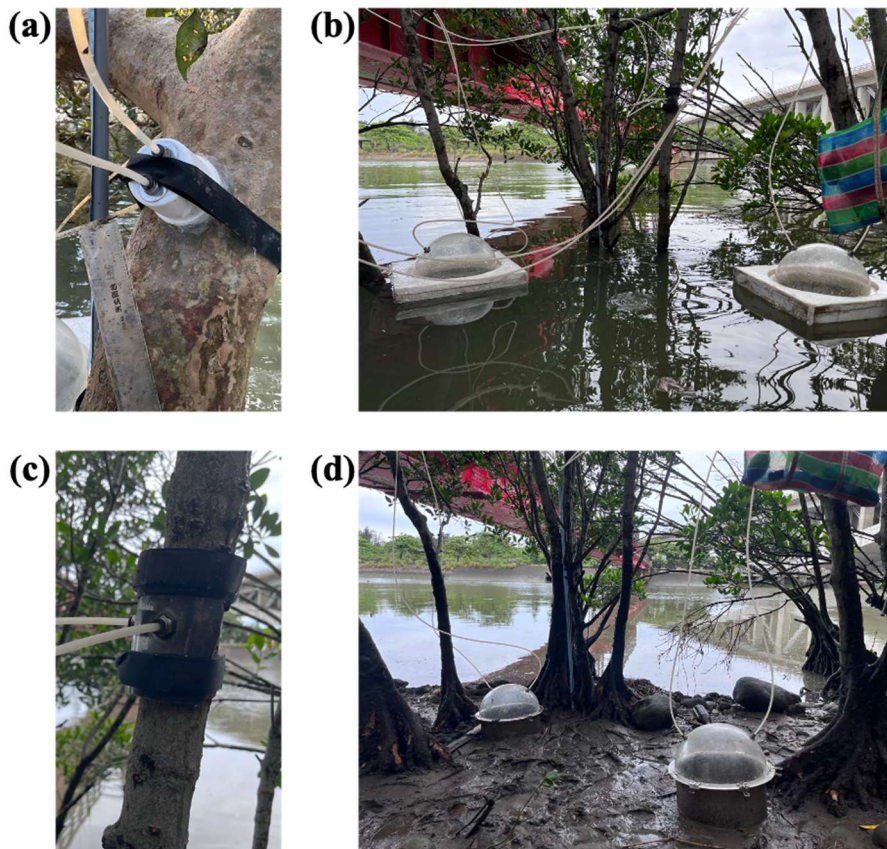

Figure S1. Photographs of flux measurements using tree stem chambers for (a) *Avicennia marina* and (b) *Kandelia obovata*, (c) floating chambers during tidal inundation and (d) soil chambers during low tide.
